# The American Journal of Psychiatry

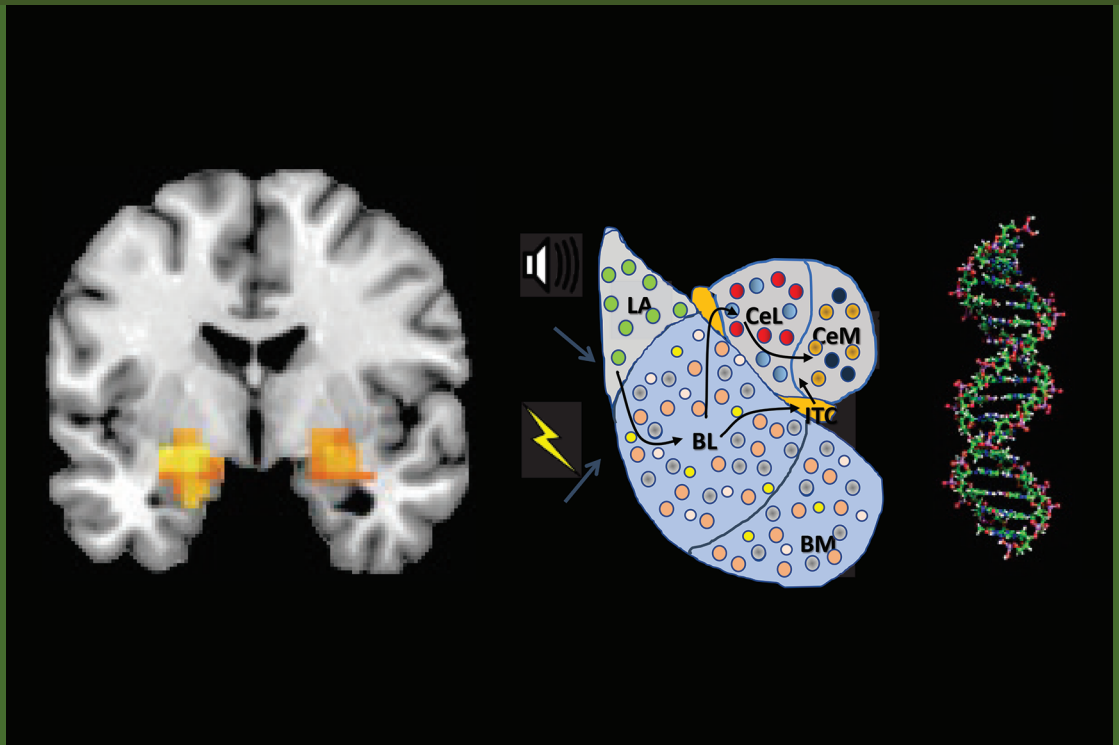

Translating Across Circuits and Genetics Toward Progress  
in Fear- and Anxiety-Related Disorders

Reproducible Genetic Risk Loci for Anxiety: Results From  
~200,000 Participants in the Million Veteran Program

Effect of CBT on Biased Semantic Network in Panic Disorder:  
A Multicenter fMRI Study Using Semantic Priming

Efficacy of Deep Brain Stimulation of the Ventral Anterior  
Limb of the Internal Capsule for Refractory  
Obsessive-Compulsive Disorder
