# Submit to *The American Journal of Psychiatry*

As the official Journal of the American Psychiatric Association, *The American Journal of Psychiatry* is the most widely read psychiatric journal in the world. Published monthly, it is an indispensable journal for all psychiatrists and other mental health professionals who need to stay on the cutting edge of virtually every aspect of psychiatry. No other psychiatric journal reaches more psychiatrists with greater impact or immediacy than *The American Journal of Psychiatry*, the journal that the overwhelming majority of psychiatrists consider essential.

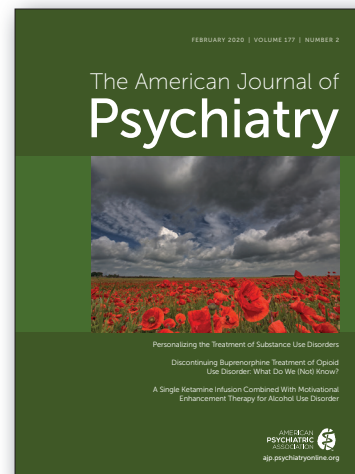

## Our Most Talked About Articles in 2019:

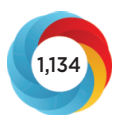

### No Support for Historical Candidate Gene or Candidate Gene-by-Interaction Hypotheses for Major Depression Across Multiple Large Samples

Article in *The American Journal of Psychiatry*, May 2019

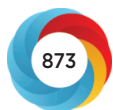

### Cannabidiol for the Reduction of Cue-Induced Craving and Anxiety in Drug-Abstinent Individuals With Heroin Use Disorder: A Double-Blind Randomized Placebo-Controlled Trial

Article in *The American Journal of Psychiatry*, November 2019

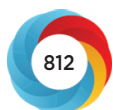

### A Population-Based Analysis of the Relationship Between Substance Use and Adolescent Cognitive Development

Article in *The American Journal of Psychiatry*, February 2019

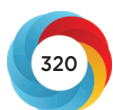

### Reducing Suicidal Ideation Through Insomnia Treatment (REST-IT): A Randomized Clinical Trial

Article in *The American Journal of Psychiatry*, November 2019

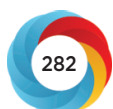

### Efficacy and Safety of Flexibly Dosed Esketamine Nasal Spray Combined With a Newly Initiated Oral Antidepressant in Treatment-Resistant Depression: A Randomized Double-Blind Active-Controlled Study

Article in *The American Journal of Psychiatry*, June 2019

# The American Psychiatric Association Publishing Textbook of Suicide Risk Assessment and Management

Edited by Liza H. Gold, M.D., and Richard L. Frierson, M.D.

Charged with updating the preeminent text on suicide, the new editors of *The American Psychiatric Association Publishing Textbook of Suicide Risk Assessment and Management* opted not to simply revise existing chapters, but instead to steer a bold course, expanding, reconfiguring, and remaking the third edition to reflect the latest research, nomenclature, and clinical innovations. The editorial team and contributors—two-thirds of whom are new to this edition—have taken the intersection of suicide with both mental health and psychosocial issues as their organizing principle, exploring risk assessment and epidemiology in special populations, such as elderly patients, college students, military personnel, and the incarcerated as well as patients with a variety of psychological disorders, including bipolar spectrum, personality, depressive, anxiety, posttraumatic stress, and other disorders and schizophrenia. In addition, the book discusses treatment options (such as cognitive-behavioral therapy, dialectical behavioral therapy, and pharmacotherapy) and settings (such as emergency services, outpatient, inpatient, and civil commitment) in detail, with clinical cases to contextualize the material.

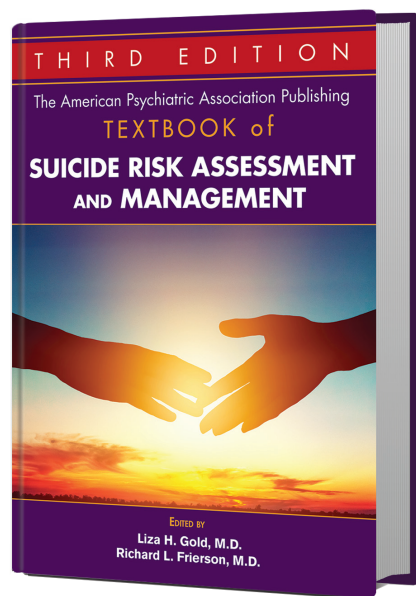

The new and revised content is extensive:

- A chapter on the influence of sleep and sleep disorders on suicide risk has been included that considers possible mechanisms for this link and discusses practical ways of assessing and managing sleep disorders to mitigate suicide risk.
- Nonsuicidal self-injury, the prevalence of which is particularly high among youth, is addressed in detail, differentiating it from and comparing it to suicide attempts, discussing risk assessment, considering safety interventions, examining treatment options, and exploring suicide contagion.
- No text on suicide would be complete without a serious exploration of the role of social media and the internet. The book presents an update on current research as it pertains to social networking and behavior, information access, and artificial intelligence and software, and includes suggestions for clinicians treating patients at risk for suicide.

Its diverse range of perspectives, broad relevance to a wide variety of clinicians, and absolutely authoritative coverage makes this new edition of *The American Psychiatric Association Publishing Textbook of Suicide Risk Assessment and Management* a worthy and indispensable successor.

2020 • 477 pages • ISBN 978-1-61537-223-2 • Hardcover • \$120.00 • Item #37223

2020 • 477 pages • ISBN 978-1-61537-284-3 • eBook • \$96.00 • Item #37284

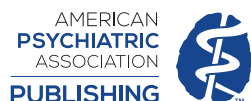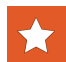

**20% Discount for American Psychiatric Association Members**  
**25% Discount for APA Resident-Fellow Members**

ORDER @ [www.appi.org](http://www.appi.org) | Email: [appi@psych.org](mailto:appi@psych.org) | Toll Free: 1-899-368-5777

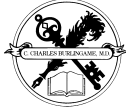

We are pleased to announce that  
**NED KALIN, M.D.**  
is the 2020 recipient of the  
**C. CHARLES BURLINGAME, M.D. AWARD**  
for his outstanding contributions to psychiatry.

**Past Recipients**

- 1988 Robert Kellner, M.D., Ph.D.
- 1989 William T. Carpenter, Jr., M.D.
- 1990 Dennis P. Cantwell, M.D.
- 1991 George E. Vaillant, M.D.
- 1992 A. John Rush, M.D.
- 1993 John C. Nemiah, M.D.
- 1994 Maurice J. Martin, M.D.
- 1995 Otto F. Kernberg, M.D.
- 1996 Charles P. O'Brien, M.D., Ph.D.
- 1997 Glen Owen Gabbard, M.D.
- 1998 Lissy F. Jarvik, M.D., Ph.D.
- 1999 Nancy C. Andreasen, M.D., Ph.D.
- 2000 Lewis L. Judd, M.D.
- 2001 Paul S. Appelbaum, M.D.
- 2002 Charles B. Nemeroff, M.D., Ph.D.
- 2003 Dilip V. Jeste, M.D.
- 2004 David H. Barlow, Ph.D.
- 2005 Herbert D. Kleber, M.D.
- 2006 Daniel N. Stern, M.D.
- 2007 Jerrold F. Rosenbaum, M.D.
- 2008 K. Ranga Rama Krishnan, M.D.
- 2009 David J. Kupfer, M.D.
- 2010 Professor Sir Michael Rutter
- 2011 Jeffrey A. Lieberman, M.D.
- 2012 Judith L. Rapoport, M.D.
- 2013 Nora D. Volkow, M.D.
- 2014 Daniel R. Weinberger, M.D.
- 2015 David A. Brent, M.D.
- 2016 Steven S. Sharfstein, M.D.
- 2017 Harold Alan Pincus, M.D.
- 2018 Kenneth S. Kendler, M.D.
- 2019 Max Fink, M.D.

**Institute  
of Living**

A Division of Hartford Hospital  
200 Retreat Avenue  
Burlingame Building  
Hartford, CT 06106  
860-545-7560

**Psychiatrist  
Inpatient/Outpatient  
WISCONSIN**

HealthPartners Medical Group is a top Upper Midwest multispecialty physician practice based in Minnesota and western Wisconsin. Our award-winning Behavioral Health team is 25+ psychiatrists strong and focused in multidisciplinary inpatient and outpatient settings. Together with social workers, nurses, PAs, therapists and OTs, we provide exceptional care to our community and are dedicated to the health and well-being of our patients.

We have an exciting full-time opportunity for a talented and caring BC/BE Psychiatrist to join our group at the Amery Hospital & Clinic (AHC) in beautiful Amery, Wisconsin. This key position provides direct inpatient and outpatient care as part of our psychiatric treatment program at AHC and nearby care sites. Leadership and other practice growth opportunities are available.

AHC is a progressive western Wisconsin community hospital located about an hour east of the Minneapolis/St. Paul metropolitan area. The Amery community offers the variety of a larger city with a sense of hometown hospitality. With an excellent school system and abundant sporting/outdoor/recreational offerings, Amery is an ideal place to put down family and practice roots. For hospital and community information, visit [www.amerymedicalcenter.org](http://www.amerymedicalcenter.org) and [www.amerywisconsin.org](http://www.amerywisconsin.org).

HealthPartners offers a competitive compensation and benefits package, paid malpractice coverage and a rewarding practice environment with support from our Twin Cities-based group. For consideration, please apply online at [healthpartners.com/careers](http://healthpartners.com/careers), forward your CV and cover letter to [lori.m.fake@healthpartners.com](mailto:lori.m.fake@healthpartners.com), or call Lori at **800-472-4695 x1**. EOE

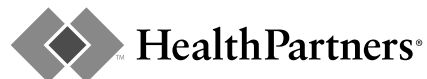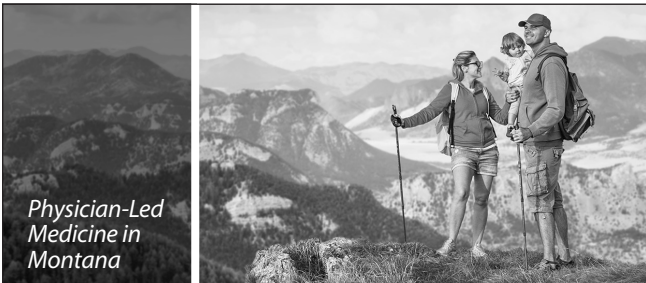

Physician-Led  
Medicine in  
Montana

**Billings Clinic**

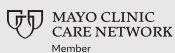

Billings Clinic is nationally recognized for clinical excellence. Billings, Montana, is a friendly college community located near the magnificent Rocky Mountains with great schools, safe neighborhoods and abundant family activities. Exciting outdoor recreation is just minutes from home. 300 days of sunshine every year!

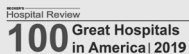

**Psychiatry  
Outpatient/Inpatient**

Seeking BE/BC Adult, Child & Emergency Psychiatrists who love teaching to join our dynamic psychiatric team.

**Top tier salary and student loan repayment**

- Join faculty at Montana's only UW regional psych residency program
- Innovative (emPATH unit, Project ECHO, integrated behavioral health)
- Minimal call with tele-psych support
- Largest and most comprehensive psychiatric center in the Northern Rockies
- Mayo Clinic Care Network provides clinical resources and direct access to Mayo Clinic specialists
- "One of the Top 25 Best Places to Live" – *Livability.com*

Contact: Rochelle Woods  
1-888-554-5922  
[physicianrecruiter@billingsclinic.org](mailto:physicianrecruiter@billingsclinic.org)  
[billingsclinic.com](http://billingsclinic.com)

# New Spring Titles

from American Psychiatric Association Publishing

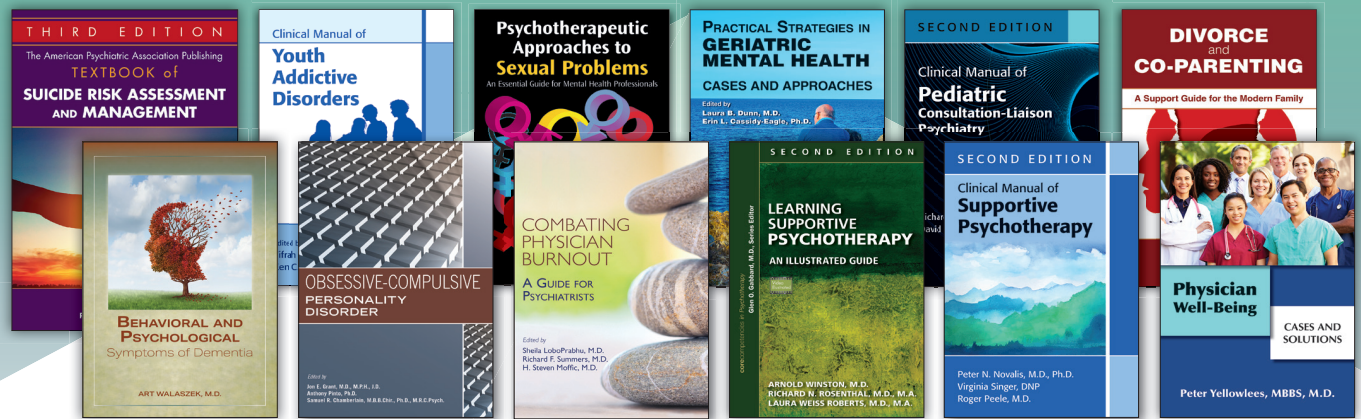

## The American Psychiatric Publishing Textbook of Suicide Risk Assessment and Management, Third Edition

Edited by Liza H. Gold, M.D., and Richard L. Frierson, M.D.

2020 • 477 pages • ISBN 978-1-61537-223-2  
Hardcover • \$120.00 • Item #37223

2020 • 477 pages • ISBN 978-1-61537-284-3  
eBook • \$96.00 • Item #37284

## Clinical Manual of Youth Addictive Disorders

Edited by Yifrah Kaminer, M.D., M.B.A., and Ken C. Winters, Ph.D.

2020 • 632 pages • ISBN 978-1-61537-236-2  
Paperback • \$75.00 • Item #37236

2020 • 632 pages • ISBN 978-1-61537-281-2  
eBook • \$60.00 • Item #37281

## Psychotherapeutic Approaches to Sexual Problems

An Essential Guide for Mental Health Professionals

Stephen B. Levine, M.D.

2020 • 157 pages • ISBN 978-1-61537-283-6  
Paperback • \$39.00 • Item #37283

2020 • 157 pages • ISBN 978-1-61537-285-0  
eBook • \$31.00 • Item #37285

## Practical Strategies in Geriatric Mental Health

Cases and Approaches

Edited by Laura B. Dunn, M.D., and Erin L. Cassidy-Eagle, Ph.D.

2020 • 512 pages • ISBN 978-1-61537-148-8  
Paperback • \$75.00 • Item #37148

2020 • 512 pages • ISBN 978-1-61537-257-7  
eBook • \$60.00 • Item #37257

## Clinical Manual of Pediatric Consultation-Liaison Psychiatry, Second Edition

Richard J. Shaw, M.B., B.S., and David R. DeMaso, M.D.

2020 • 566 pages • ISBN 978-1-61537-231-7  
Paperback • \$75.00 • Item #37231

2020 • 566 pages • ISBN 978-1-61537-279-9  
eBook • \$60.00 • Item #37279

## Divorce and Co-parenting

A Support Guide for the Modern Family

Elissa P. Benedek, M.D., and Samantha A. Huettner, J.D.

2020 • 272 pages • ISBN 978-1-61537-220-1  
Paperback • \$29.00 • Item #37220

2020 • 272 pages • ISBN 978-1-61537-271-3  
eBook • \$23.00 • Item #37271

## Behavioral and Psychological Symptoms of Dementia

Art Walaszek, M.D.

2020 • 284 pages • ISBN 978-1-61537-168-6  
Paperback • \$65.00 • Item #37168

2020 • 284 pages • ISBN 978-1-61537-267-6  
eBook • \$52.00 • Item #37267

## Obsessive-Compulsive Personality Disorder

Edited by Jon E. Grant, M.D., M.P.H., J.D., Samuel R. Chamberlain, MBChir, Ph.D., MRCPsych, and Anthony Pinto, Ph.D.

2020 • 275 pages • ISBN 978-1-61537-224-9  
Paperback • \$54.00 • Item #37224

2020 • 275 pages • ISBN 978-1-61537-280-5  
eBook • \$43.00 • Item #37280

## Combating Physician Burnout

A Guide for Psychiatrists

Edited by Sheila LoboPrabhu, M.D., Richard F. Summers, M.D., and H. Steven Moffic, M.D.

2020 • 344 pages • ISBN 978-1-61537-227-0  
Paperback • \$60.00 • Item #37227

2020 • 344 pages • ISBN 978-1-61537-272-0  
eBook • \$48.00 • Item #37272

## Learning Supportive Psychotherapy

An Illustrated Guide, Second Edition  
Core Competencies in Psychotherapy

Arnold Winston, M.D., Richard N. Rosenthal, M.D., and Laura Weiss Roberts, M.D., M.A.

2020 • 232 pages • ISBN 978-1-61537-234-8  
Paperback • \$70.00 • Item #37234

2020 • 232 pages • ISBN 978-1-61537-287-4  
eBook • \$56.00 • Item #37287

## Clinical Manual of Supportive Psychotherapy, Second Edition

Peter N. Novalis, M.D., Ph.D., Virginia Singer, D.N.P., and Roger Peele, M.D.

2020 • 469 pages • ISBN 978-1-61537-165-5  
Paperback • \$77.00 • Item #37165

2020 • 469 pages • ISBN 978-1-61537-273-7  
eBook • \$62.00 • Item #37273

## Physician Well-Being

Cases and Solutions

Peter Yellowlees, MBBS, M.D.

2020 • 265 pages • ISBN 978-1-61537-240-9  
Paperback • \$55.00 • Item #37240

2020 • 265 pages • ISBN 978-1-61537-290-4  
eBook • \$44.00 • Item #37290

AMERICAN  
PSYCHIATRIC  
ASSOCIATION  
PUBLISHING

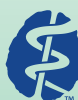

ORDER @ [www.appi.org](http://www.appi.org)

Email: [appi@psych.org](mailto:appi@psych.org) | Toll Free: 1-899-368-5777

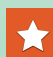

20% Discount for American Psychiatric Association Members  
25% Discount for APA Resident-Fellow Members

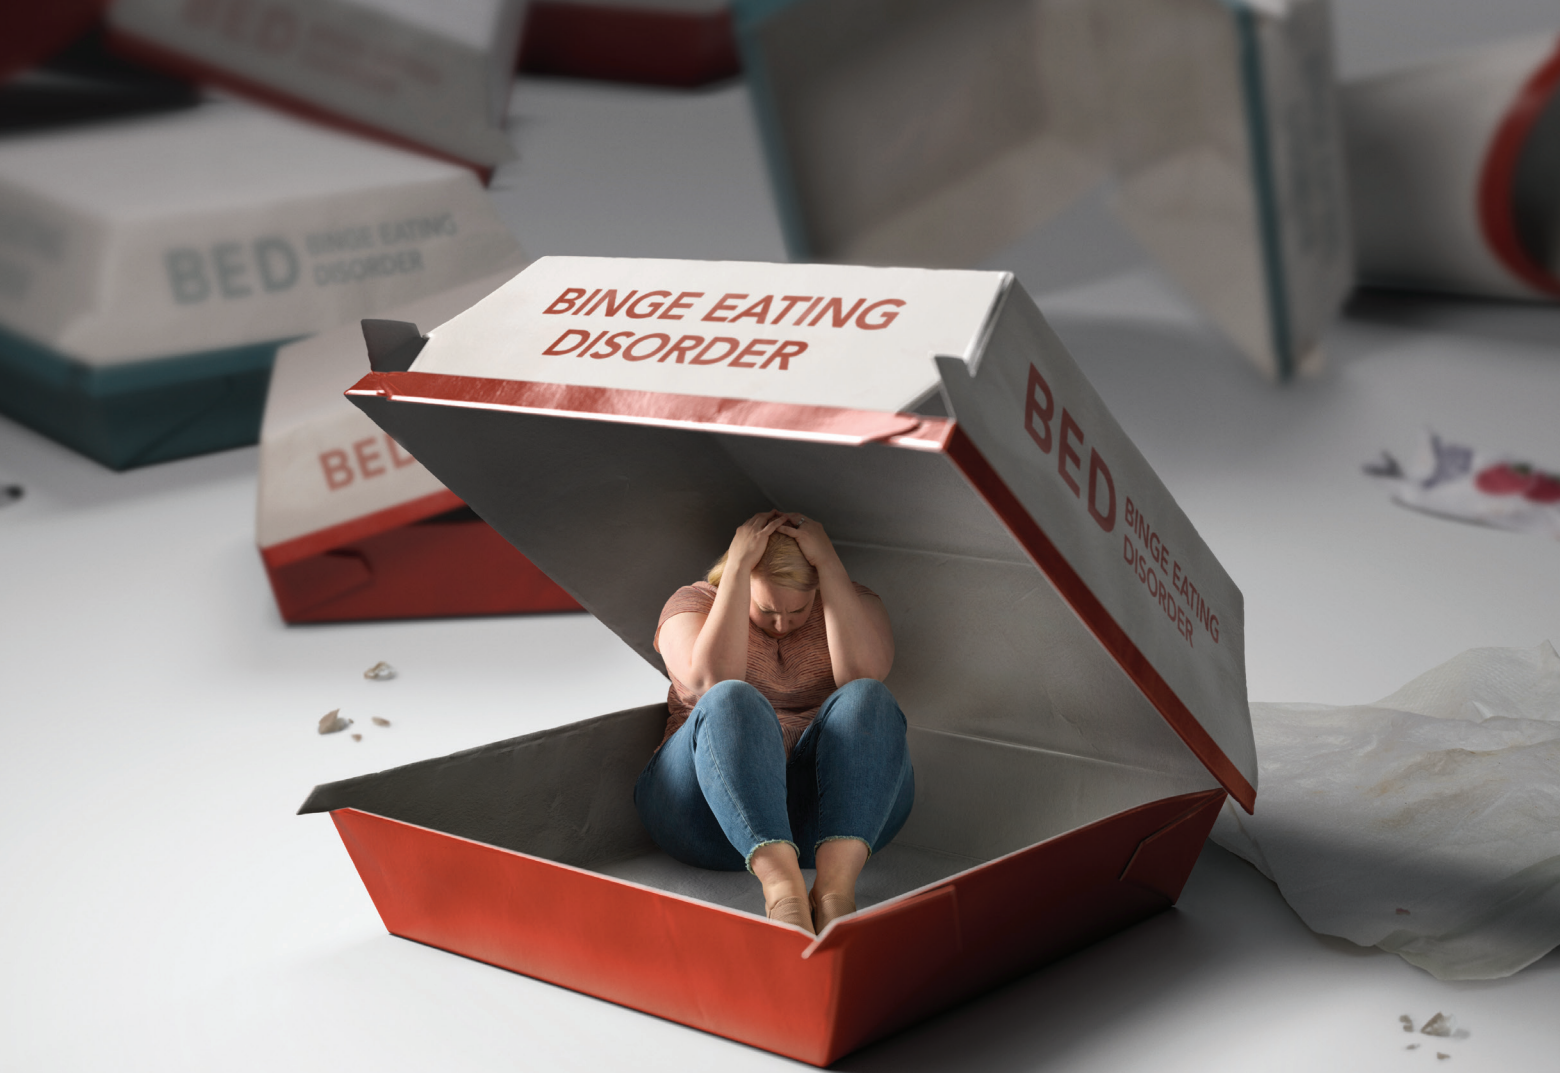

## BINGE EATING DISORDER (BED) CONSUMES HER

People with BED may feel trapped by compulsive eating behavior and obsessive thoughts around food<sup>1-3</sup>

BED is a neuropsychiatric condition that has been shown to significantly impact a patient's life, affecting both work and personal interactions.<sup>4,5</sup> But deep shame and guilt may cause people with BED to hide their symptoms<sup>4</sup>—even from their psychiatrists. Careful probing about BED symptoms may help patients feel more comfortable, so they don't shut down the conversation.<sup>6</sup>

► Visit [BurdenofBED.com](https://www.burdenofbed.com) to learn more and to download a Conversation Starter

Start the BED conversation

**References:** 1. Deal LS, Wirth RJ, Gasior M, et al. *Int J Eat Disord.* 2015;48(7):994-1004. 2. McElroy SL, Phillips KA, Keck PE, Jr. *J Clin Psychiatry.* 1994;55(10) suppl:33-51. 3. Beglin SJ, Fairburn CG. *Am J Psychiatry.* 1992;149(1):123-124. 4. American Psychiatric Association. Binge eating disorder. In: *Diagnostic and Statistical Manual of Mental Disorders, 5th ed.* Arlington, VA: American Psychiatric Association; 2013:350-353. 5. Rieger E, Wilfley DE, Stein RI, et al. *Int J Eat Disord.* 2005;37(3):234-240. 6. Kornstein SG, Keck PE Jr, Herman BK, et al. *Postgrad Med.* 2015;127(7):661-670.

SUNOVION and  are registered trademarks of Sumitomo Dainippon Pharma Co., Ltd. Sunovion Pharmaceuticals Inc. is a U.S. subsidiary of Sumitomo Dainippon Pharma Co., Ltd. © 2019 Sunovion Pharmaceuticals Inc. All rights reserved. 11/19 NPC-DAS-US-00085-19

 sunovion
